# Supplementary figures and images for: Comparative antitumor studies of organoruthenium complexes with 8-hydroxyquinolines on 2D and 3D cell models of bone, lung and breast cancer
Source: Royal Society of Chemistry journal article supplement (doi:10.1039/c8mt00369f), 2019-02-18

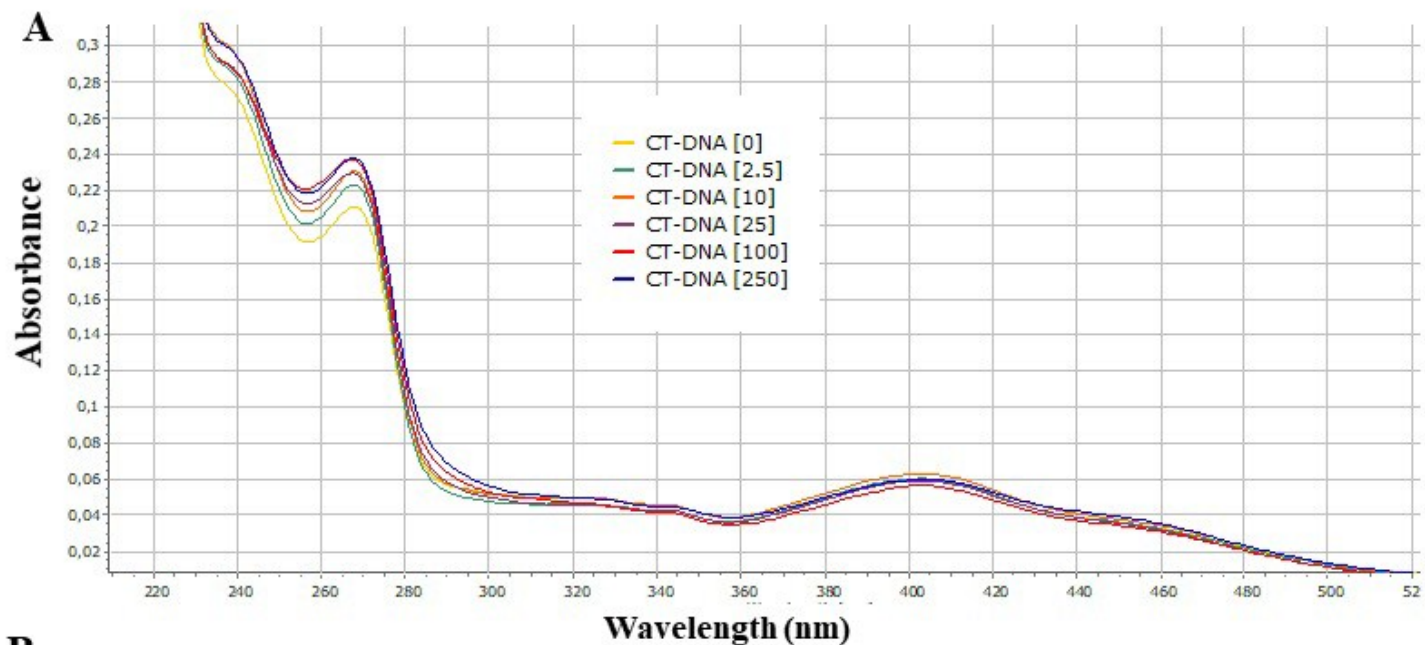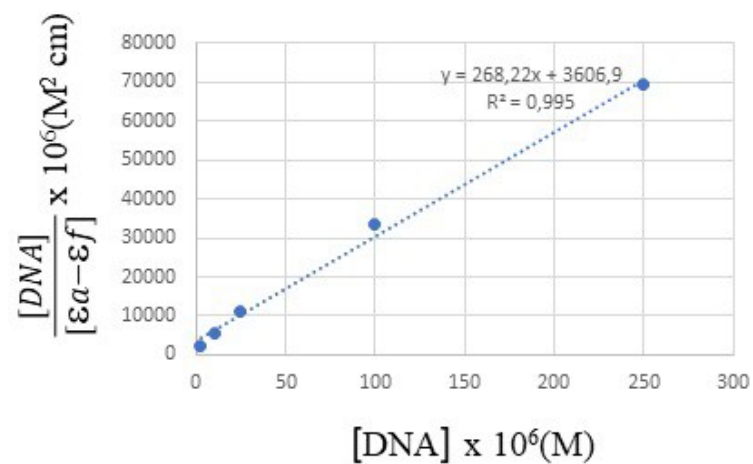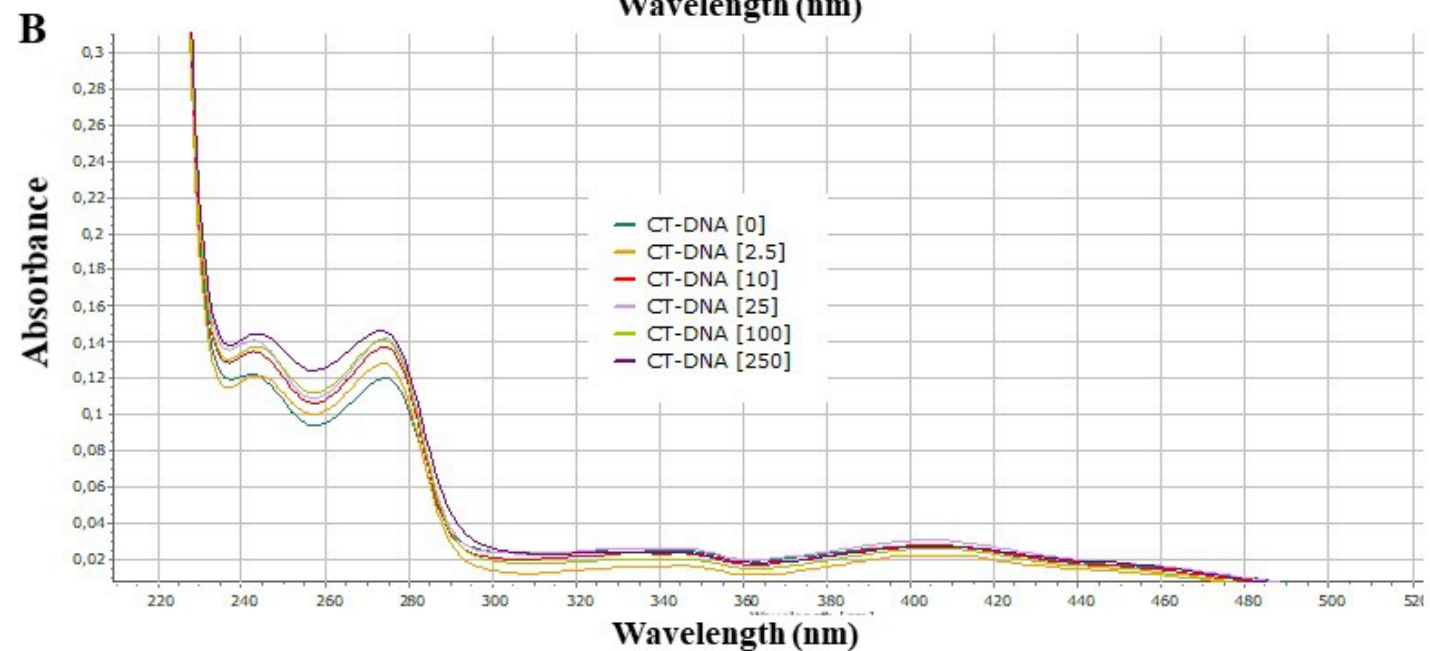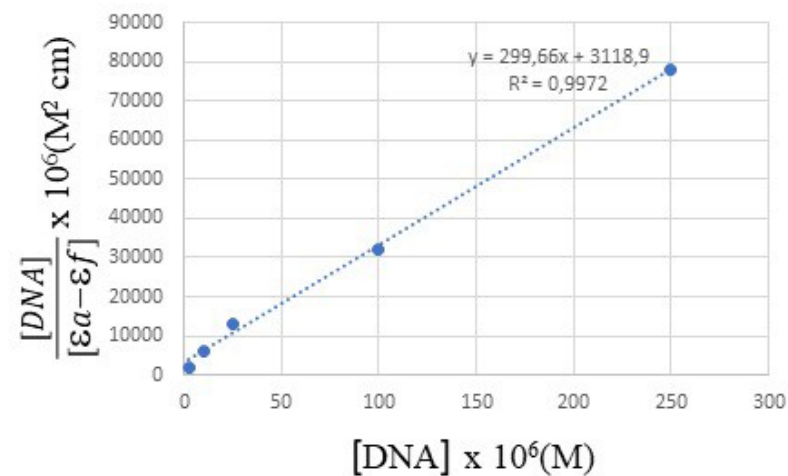

Supplement: c8mt00369f2.pdf [file c8mt00369f2.pdf]

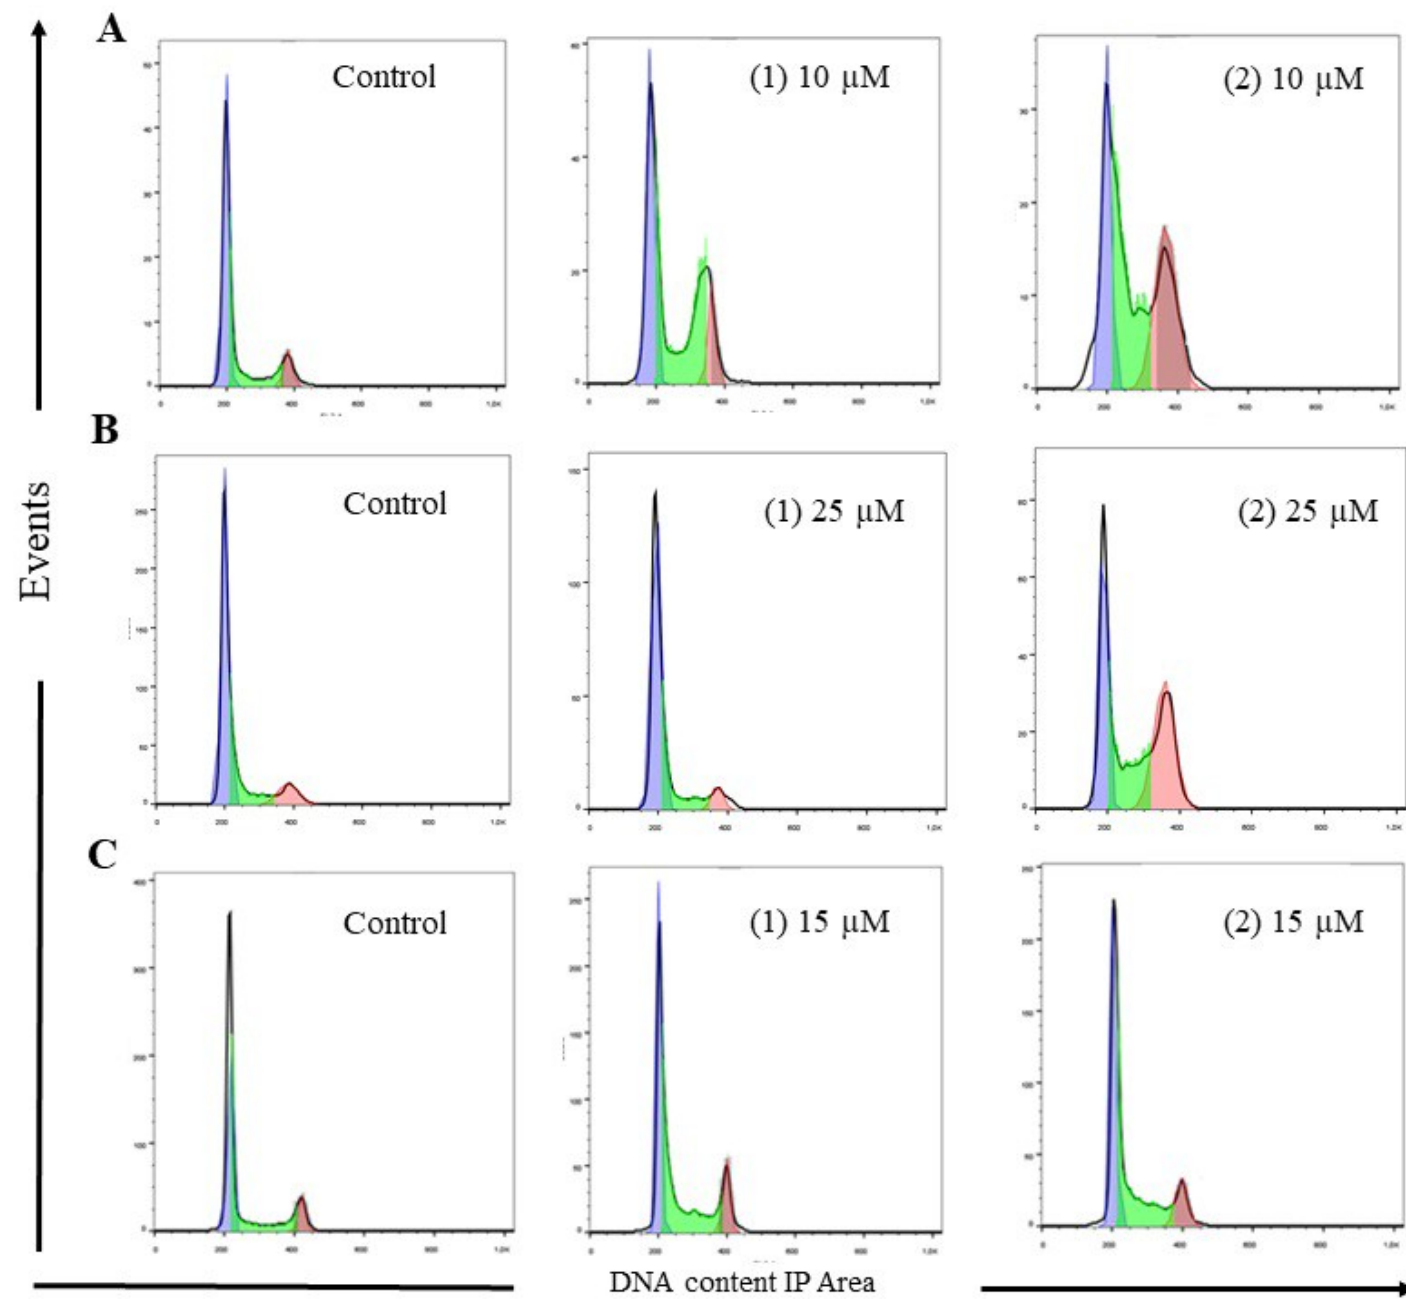

Supplement: c8mt00369f3.pdf [file c8mt00369f3.pdf]

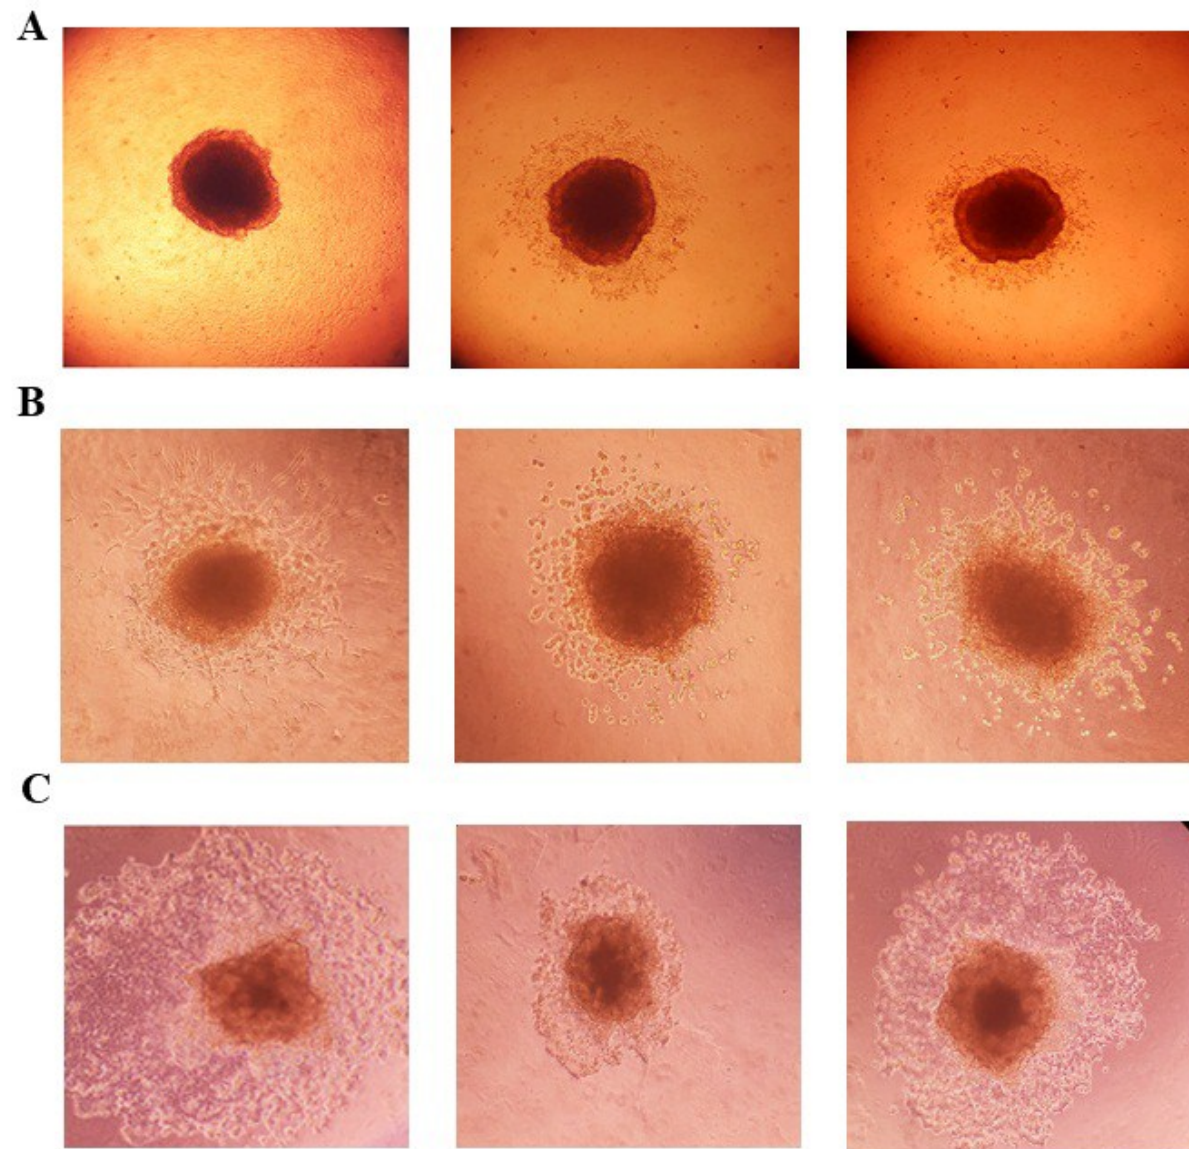

Supplement: c8mt00369f4.pdf [file c8mt00369f4.pdf]
